# Supplementary material for: The Impact of Government Climate Narrative Plot on Public Pro-Environmental Behavior Intentions: A Survey Experiment
Source: Research Square preprint supplement (doi:10.21203/rs.3.rs-6230248/v1), 2025-04-29
Supplement: Supplementary file 1 [file bedc3de64ce14ff7a6ebe740.docx]

**Supplementary Materials**

For

# The Impact of Government Climate Narrative Plot on Public Pro-Environmental Behavior Intentions: A Survey Experiment in China

Contents

[Appendix A. Manipulation materials 2](#_Toc25866)

*[A1. Articles on government climate narratives containing experimental manipulation](#_Toc2860)* [2](#_Toc2860)

*[A2. Experimental Questionnaire Item Design and Coding](#_Toc2880)* [8](#_Toc2880)

[Appendix B. Additional Data and Materials 10](#_Toc11078)

*[B1. Demographic characteristics](#_Toc17248)* [10](#_Toc17248)

*[B2. Variable Correlation Analysis](#_Toc18369)* [10](#_Toc18369)

# Appendix A. Manipulation materials

***A1. Articles on government climate narratives containing experimental manipulation***

In the four experimental groups, narrative materials were provided based on the emotional framing and temporal framing of the narratives (see Table A1). *Negative Framing × Occurred Framing (Context Narrative) Group*: This group emphasized the severe damage that climate change has already inflicted on the ecological environment and people's livelihoods. *Positive Framing × Occurred Framing (Performance Narrative) Group*: This group highlighted the significant achievements made by the government in mitigating climate change through policy measures.

*Negative Framing × Not Occurred Framing (Risk Narrative) Group*: This group focused on the ongoing threats posed by climate change to natural ecosystems and human society. *Positive Framing × Not Occurred Framing (Vision Narrative) Group*: This group showcased the specific policy plans and future goals of the nation in addressing climate change.

**Table A1.**

**Narrative Material**

|  | Temporal Framing | | |
| --- | --- | --- | --- |
| Emotional Framing |  | Occurred | Not Occurred |
| Negative Emotion | Context Narrative | Risk Narrative |
| Positive Emotion | Performance Narrative | Vision Narrative |

The textual materials were sourced from articles published in well-known Chinese official media outlets, such as *People's Daily* and *Xinhua News Agency*. The detailed content is as follows:

1. **Negative Framing × Occurred Framing**

**Jointly Addressing the Challenge of Climate Change**

Human activities **have caused** a global rise in temperatures across the atmosphere, oceans, and land. The 50 years from 1970 to 2020 were the warmest in the past 2,000 years. From 1901 to 2018, the global average sea level rose by 0.2 meters, with the rate of increase faster than in any century of the past 3,000 years. Between 2011 and 2020, global surface temperatures **increased** by 1.09°C **compared to** pre-industrial levels, with approximately 1.07°C of this warming attributed to human activities.

Extreme weather is having a **direct and** **significant negative impact** on global agricultural production. According to the United Nations Food and Agriculture Organization (FAO), the FAO Food Price Index surged to its highest level in nearly a decade in May this year. Furthermore, as climate warming intensifies, **the challenges** **faced** by China are becoming more severe. The average temperature in the country is rising, and the frequency of extreme heat waves and heavy rainfall events is expected to increase significantly. Since July this year, many regions across the country **have frequently experienced** **heavy rainfall and flooding disasters**, with the phenomenon of "cities looking like seas" **occurring frequently**. Urban flood control and drainage issues remain critical. For example, in Zhengzhou, Henan, a sudden downpour caused water accumulation exceeding 30 centimeters in more than 30 districts, forcing pedestrians and vehicles to navigate through the water.

**These changes** remind us that climate warming is no longer just a global issue; it is now a reality that **directly impacts** everyone's daily life, whether they live in cities or in rural areas. Now is the key moment for us to take action. By reducing carbon emissions and protecting the environment, we can address these seemingly irreversible changes. (Source: *People's Daily*, August 24, 2021 <http://world.people.com.cn/n1/2021/0824/c1002-32204740.html>)

**2. Positive Framing × Occurred Framing**

**China's Positive Progress in Addressing Climate Change**

In response to the increasingly severe challenges posed by climate change, China **has placed** high importance on climate action, implementing a national strategy to address climate change and announcing its goals of achieving carbon peak and carbon neutrality. The country **has established** a comprehensive "1+N" policy framework for carbon peak and carbon neutrality, promoting structural adjustments in industries, energy, and transportation sectors. Measures such as energy conservation, **improved** energy efficiency, the development of market mechanisms, and **increased** forest carbon sinks have been adopted, leading to **significant progress** in addressing climate change.

**Notable Achievements in Meeting Climate Goals**. China has made **substantial progress** in achieving its climate targets. Carbon emission intensity **has continued to decline**, while the share of non-fossil energy consumption has steadily increased. As of 2021, the forest coverage rate has reached 24.02%. Significant Progress in Green and Low-Carbon Development in Key Sectors

China has **actively** promoted the optimization and upgrading of its industrial structure. The production and sales of new energy vehicles have ranked first globally for eight consecutive years. Non-fossil energy development **has accelerated rapidly**. The clean utilization of fossil energy has also improved continuously. Green and low-carbon development in the transportation and urban-rural construction sectors has progressed steadily, while the **carbon sink capacity of ecosystems has been consistently strengthened**.

**Continuous Improvement** of Market Mechanisms. The China Carbon Emission Trading Market, the world's largest carbon market in terms of covered greenhouse gas emissions, was officially launched in July 2021. It currently covers over 5 billion tons of carbon dioxide emissions annually. A preliminary institutional framework has been established, and the first compliance cycle of the national carbon market was successfully completed. As of October 25 this year, the cumulative trading volume of carbon emission allowances reached 365 million tons, with a cumulative turnover of 19.437 billion yuan. (Source: *People's Daily*, November 2, 2023, <http://env.people.com.cn/n1/2023/1102/c1010-40108197.html)>

1. **Negative Framing × Not Occurred Framing**

**"Boiling July" Sounds the Alarm on Global Climate Crisis**

Heat, drought, wildfires, heavy rain, and floods—extreme weather events closely linked to climate change—are **projected to occur** with alarming frequency in the coming decades. If current trends persist, these events **will have devastating impacts on** human health, ecosystems, the economy, agriculture, energy, and water supplies, posing an unprecedented and persistent threat to global stability. Imagine a **future** where scorching summers render entire regions uninhabitable, where coastal cities are submerged by rising sea levels, and where food and water scarcity trigger mass displacement and conflict. Such catastrophic scenarios are not distant possibilities but **looming risks** that could materialize within our lifetimes if immediate action is not taken.

The extreme impacts of climate change align with scientists' previous **warnings**, but the speed at which these changes are occurring far exceeds expectations. As human activities continue to intensify, global greenhouse gas emissions are increasing. Climate resilience and sustainable development **are facing increasingly severe challenges**. The United Nations Intergovernmental Panel on Climate Change (IPCC) has warned that if global temperatures exceed the "climate tipping point," the frequency and intensity of climate disasters will rise sharply. Of the 15 global climate tipping points, 9 have already been triggered, and the "gray rhino" of the **climate crisis is accelerating toward humanity**.

China, with its complex geography and inherently vulnerable ecosystems, is poised to be among the countries most severely impacted by these **future climate risks**. "If greenhouse gas emissions are not drastically reduced, the global climate system **will continue to** warm, pushing the Earth toward an unstable 'Hothouse Earth' state," warned QIN Dahe, an academician of the Chinese Academy of Sciences. "In such a scenario, both natural ecosystems and human societies **will confront** even graver risks—frequent megafires, prolonged droughts, and catastrophic flooding could become the norm, threatening food security, public health, and economic stability." QIN emphasized that society must act swiftly to avert this **looming crisis** by significantly reducing greenhouse gas emissions, accelerating the transition to low-carbon clean energy, enhancing carbon sinks, and adopting sustainable lifestyles. (Source: *People's Daily*, August 5, 2023 <http://world.people.com.cn/n1/2023/0805/c1002-40050830.html>)

**4. Positive Framing × Not Occurred Framing**

**Promoting the Achievement of Carbon Peak and Carbon Neutrality Targets on Schedule**

In response to climate change, China **is fulfilling its commitments** to carbon peak and carbon neutrality targets with **great efforts**. Recently, the "Opinions of the Central Committee of the Communist Party of China and the State Council on Fully, Accurately, and Comprehensively Implementing the New Development Philosophy and Advancing Carbon Peak and Carbon Neutrality" and the "Action Plan for Carbon Peaking Before 2030" were released. The "1+N" policy system for carbon peak and carbon neutrality is being rapidly formed.

The **next steps** involve breaking down the 18% carbon intensity reduction target for the 14th Five-Year Plan into specific local measures for implementation; promoting carbon peak actions and advancing the implementation of the "1+N" policy system for carbon peak and carbon neutrality; coordinating the **efforts to** address climate change with ecological and environmental protection, aiming for synergistic effects of pollution reduction and carbon reduction; **continuing to improve** the national carbon market; strengthening the construction of related systems, and implementing a system focused on carbon intensity control, with carbon emission total control as a supplementary measure. Additionally, **efforts will be made to promote** the development of green and low-carbon production and living styles, and enhance the resilience of urban and rural construction, agricultural production, and infrastructure to climate change.

China has set the goal to increase the share of non-fossil energy in total energy consumption to around 25% by 2030, with total installed capacity for wind and solar power generation reaching over 1.2 billion kilowatts. China **will strongly support** the green and low-carbon energy development of developing countries and will no longer build new overseas coal power projects. China **will continue** to control the growth of coal consumption, intensify the development of renewable energy, accelerate the improvement of the power system, and build a new power system that accommodates high proportions of renewable energy. Achieving carbon neutrality and carbon peaking is **creating higher progress and shaping a better future**. (Source: *Xinhua News Agency*, October 28, 2021 <http://finance.people.com.cn/n1/2021/1028/c1004-32266904.html>)

***A2. Experimental Questionnaire Item Design and Coding***

The design and coding of the experimental questionnaire items were carefully structured to ensure clarity, consistency, and alignment with the research objectives. Below is an overview of the process:

The questionnaire included items to measure key variables such as risk perception, benefit perception, pro-environmental behavioral intentions, and demographic information. Each variable was operationalized using validated scales from prior studies to ensure reliability and validity (see Table A2).

Risk Perception (RP): Measured using items that assess participants' perceptions of the severity and likelihood of climate-related risks.

Benefit Perception (BP): Captured participants' beliefs about the positive outcomes of adopting pro-environmental behaviors.

Pro-Environmental Behavioral Intentions (PEBI): Assessed participants' willingness to engage in specific environmentally friendly actions.

Demographic Information: Included items on gender, age, educational level, residence environmental awareness level (EAL), and environmental behavioral experience (EBE).

Participants were randomly assigned to one of the four experimental conditions (e.g., Negative Framing × Occurred Framing) and exposed to the corresponding narrative material. After reading the narrative, participants answered questions related to their emotional responses, perceived risks, and behavioral intentions.

**Table A2.**

**Variable Measurement and Description**

| Variable  types | Variable name | Measuring |
| --- | --- | --- |
| Independent variable | *Treatment* | Emotional framing: Negative = 0; Positive = 1;  Timing framing: Occurred = 1; Not occurred = 0 |
| Dependent variable | *PEBI*  ( *α* = .87) | After reading the information, I intend to adopt more low-carbon and energy-conscious behaviors in daily life(e.g., walking, cycling, using public transport, or driving electric vehicles): (1 = strongly agree, 7 = strongly disagree) |
| After reading the information, I intend to purchase sustainable products: (1 = strongly agree, 7 = strongly disagree) |
| After reading the information, I intend to participate in environmental volunteer activities: (1 = strongly agree, 7 = strongly disagree) |
| Mediating variable | *RP*  ( *α* = .82) | After reading the information, I am concerned about the long-term effects of climate change: (1 = strongly agree, 7 = strongly disagree) |
| After reading the information, I believe that climate change poses significant risks to my health and well-being: (1 = strongly agree, 7 = strongly disagree) |
| After reading the information, I believe that addressing climate change through governance is an urgent priority: (1 = strongly agree, 7 = strongly disagree) |
| *BP*  ( *α* = .85) | After reading the information, I believe that the issue of climate change has improved significantly: (1 = strongly agree, 7 = strongly disagree) |
| After reading the information: I believe that climate governance will help improve my health and well-being.(1 = strongly agree, 7 = strongly disagree) |
| After reading the information: I believe that the implementation of climate policy programs will bring many benefits to social development.(1 = strongly agree, 7 = strongly disagree) |
| Control variable | *Gender* | Your gender: (Male = 0; Female = 1) |
| *Age* | Your age: (18-24 = 1; 25-34 = 2; 35-44 = 3; 45-54 = 4; 55-64 = 5; 65 and above = 6) |
| *Edu* | Your educational level: (Below high school = 0; High school = 1; Associate degree = 2; Master’s degree = 3; Bachelor’s degree or higher = 4) |
| *Residence* | Urban = 0; Rural = 1 |
| *EAL* | My level of concern about environmental issues is:（very unconcerned = 0, very concerned = 7） |
| My level of understanding of current environmental policies is:  (very uninformed = 0, very well-informed = 7) |
| *EBE* | In the past year, have you participated in any environmental protection activities? (No = 0; Yes = 1) |

# Appendix B. Additional Data and Materials

## *B1. Demographic characteristics*

Table B1 presents the demographic characteristics of the experiment participants, including information on gender, age, education level, and place of residence. The table is categorized by experimental groups (G1, G2, G3, G4) and provides the sample size (obs) as well as the percentage distribution of each variable. This data is used to ensure balance among the experimental groups and provide background information for subsequent analysis.

**Table B1.**

**Demographic characteristics**

| **Variable** |  | **Treatment group** | | | |
| --- | --- | --- | --- | --- | --- |
| G1 | G2 | G3 | G4 |
|  | obs | 154 | 143 | 152 | 189 |
| Gender | *Male* | 27.9% | 31.5% | 28.3% | 30.7% |
|  | *Female* | 72.1% | 68.5% | 71.7% | 69.3% |
| Age | *18-24* | 31.2% | 28.0% | 29.6% | 29.1% |
|  | *25-34* | 40.3% | 41.3% | 36.2% | 39.7% |
|  | *35-44* | 23.4% | 27.3% | 28.3% | 28.6% |
|  | *45-54* | 3.9% | 2.8% | 5.3% | 1.6% |
|  | *55-64* | 0.6% | 0.7% | 0.7% | 1.1% |
|  | ≥*65* | 0.6% | 0.0% | 0.0% | 0.0% |
| Education | *≤Junior High* | 1.3% | 0.7% | 0.7% | 1.6% |
|  | *High School* | 3.2% | 1.4% | 2.0% | 2.6% |
|  | *Associate* | 9.1% | 11.2% | 11.8% | 9.0% |
|  | *Bachelor's* | 76.0% | 65.7% | 69.1% | 70.9% |
|  | *≥ Master's* | 10.4% | 21.0% | 16.4% | 15.9% |
| Residence | *Urban* | 92.2% | 88.8% | 91.4% | 91.0% |
|  | *Rural* | 7.8% | 11.2% | 8.6% | 9.0% |

##

## *B2. Variable Correlation Analysis*

Table B2 shows that, consistent with theoretical expectations, there is a strong negative correlation between Emotion Frame (EF) and Risk Perception (RP) (r = -0.632, p < 0.001), and a moderate positive correlation between Emotion Frame (EF) and Benefit Perception (BP) (r = 0.501, p < 0.001).

Risk Perception (RP) is positively correlated with Pro-environmental Behavioral Intentions (PEBI) (r = 0.235, p < 0.001), and has a weaker positive correlation with Narrative Temporal Frame (TF) (r = 0.080, p < 0.05).

Benefit Perception (BP) shows a moderate positive correlation with Narrative Temporal Frame (TF) (r = 0.188, p < 0.001), and a weak positive correlation with Pro-environmental Behavioral Intentions (PEBI) (r = 0.119, p < 0.01).

**Table B2.**

**Variable Correlation Analysis**

|  | Emot | RP | BP | PEBI | TF | EAL | EBE |
| --- | --- | --- | --- | --- | --- | --- | --- |
| Emot | 1 | -0.632*** | 0.501*** | -0.191*** | 0.073 | -0.057 | -0.005 |
| RP | -0.632*** | 1 | -0.330*** | 0.235*** | 0.080* | 0.098 | -0.032 |
| BP | 0.501*** | -0.330*** | 1 | 0.119** | 0.188*** | 0.014 | 0.012 |
| PEBI | -0.191*** | 0.235*** | 0.119** | 1 | 0.042 | 0.498*** | -0.040 |
| TF | 0.073 | 0.080* | 0.188*** | 0.042 | 1 | -0.057 | -0.048 |
| EAL | -0.057 | 0.098* | 0.014 | 0.498*** | -0.057 | 1 | -0.119** |
| EBE | -0.005 | -0.032 | 0.012 | -0.040 | -0.048 | -0.119** | 1 |

Note:*p < 0.05, **p < 0.01, ***p < 0.001.
